# Supplementary material for: Electrochemical aptasensor for Salmonella detection using Nafion-doped reduced graphene oxide
Source: Royal Society of Chemistry journal article supplement (doi:10.1039/d2sd00098a), 2022-01-01
Supplement: d2sd00098a1.pdf [file d2sd00098a1.pdf]

## Supplementary data

### **Electrochemical aptasensor for Salmonella detection using Nafion-doped reduced graphene oxide**

Shalini Muniandy<sup>1</sup>, Kwai Lin Thong<sup>1</sup>, Jimmy Nelson Appaturi<sup>2</sup>, Chin Wei Lai<sup>1</sup>, Bey Fen Leo<sup>1,3\*</sup>

<sup>1</sup>Nanotechnology and Catalysis Research Centre, Institute of Graduate Studies, University of Malaya, 50603 Kuala Lumpur, Malaysia

<sup>2</sup>School of Chemical Sciences, Universiti Sains Malaysia, 11800 Penang, Malaysia

<sup>3</sup>Department of Molecular Medicine, Faculty of Medicine, University of Malaya, 50603 Kuala Lumpur, Malaysia

\*Corresponding author: beyfenleo@um.edu.my

## The selectivity of the aptasensor

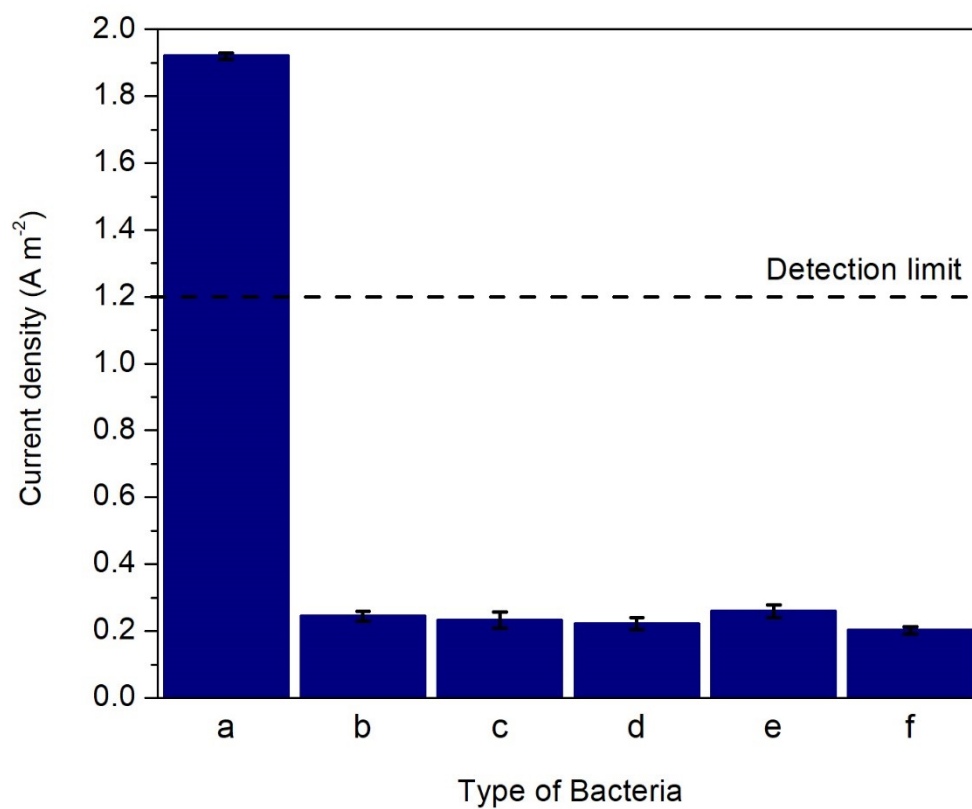

Fig. S1: The selectivity of the aptasensor was analysed by exposing the fabricated electrodes to (a) *S. Typhimurium*, (b) *E. coli*, (c) *Shi. dysenteriae*, (d) *V. cholerae*, (e) *Staph. aureus* and (f) *K. pneumoniae*.

## Validation of experimental results with PCR method

The results obtained by aptasensor for sensitivity test was validated with PCR assay as shown in **Figure S2 (A)**. PCR amplification of the ompC of *S. Typhimurium* gave a DNA fragment of 204 bp. DNA extracted from the different concentrations of bacterial cell density ( $10^8$ - $10^1$  cfu mL<sup>-1</sup>) were tested with PCR. The results obtained showed the detection limit of PCR was only up to  $10^2$  cfu mL<sup>-1</sup> as compared to the detection limit of aptasensor which was  $10^1$  cfu mL<sup>-1</sup>. This shows aptasensing is more sensitive than PCR. Moreover, the selectivity and specificity of the aptamer to other types of *Salmonella* and non-*Salmonella* bacteria were also investigated. For both the selectivity and specificity test, the DNA of *Salmonella* and non-*Salmonella* bacteria were captured using aptamer-conjugated magnetic beads. All the DNA were extracted and subjected to PCR reaction using species-specific primers.

**Figure S2 (B)** shows the selectivity test of the aptamer against other types of *Salmonella* bacteria namely, *S. Paratyphi A*, *S. Enteritidis*, *S. Typhimurium*, *S. Typhi*, *S. Albany*, *S. Corvallis* and *S. Pullorum*. The PCR image showed the presence for a positive band for all other types of *Salmonella* bacteria which indicates the aptamer used in this study is selective for all other *Salmonella* bacteria other than *S. Typhimurium*. Moreover, **Figure S2 (C)** shows the PCR obtained for different types of bacteria. The PCR amplification for non-*Salmonella* bacteria showed the absence of a positive band for all the five samples tested indicating the aptamer used in this study were only specific to *Salmonella* bacteria.

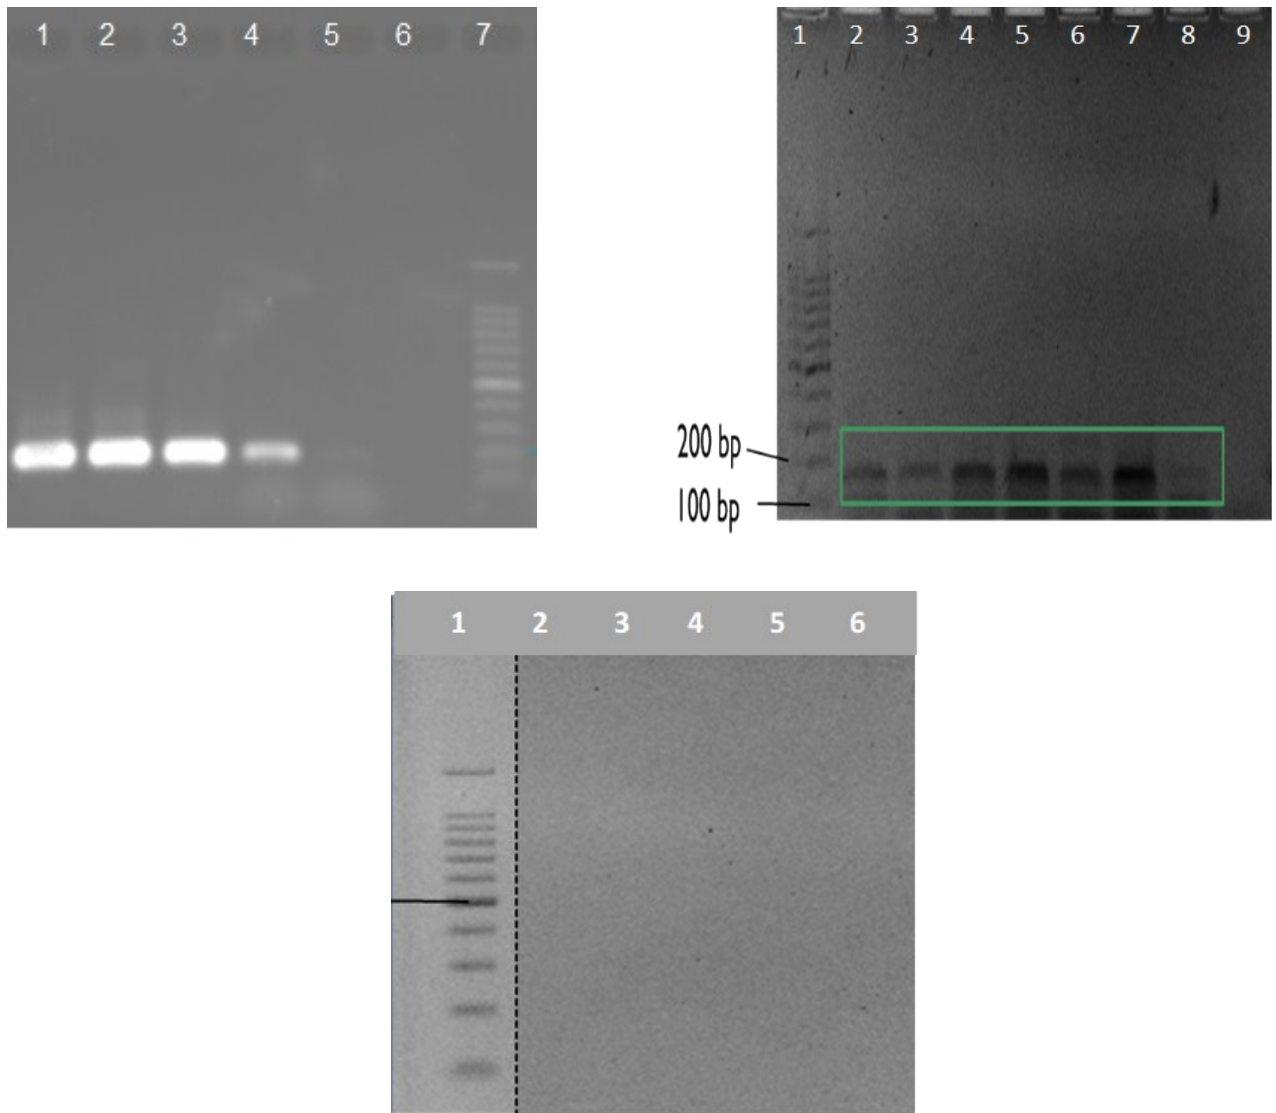

**Figure S2 (A)** The sensitivity of detection by PCR for *S. Typhimurium*. Gel electrophoresis patterns of PCR products obtained at different concentration of DNA: Lane 1,  $10^8$  cfu mL<sup>-1</sup>; Lane 2,  $10^6$  cfu mL<sup>-1</sup>; Lane 3,  $10^4$  cfu mL<sup>-1</sup>; Lane 4,  $10^2$  cfu mL<sup>-1</sup>; Lane 5,  $10^1$  cfu mL<sup>-1</sup>; Lane 6, negative control; and Lane 7, 100 bp ladder. **(B)** The specificity test for different types of *Salmonella* bacteria: Lane 1, 100 bp ladder; Lane 2, *S. Typhimurium*; Lane 3, *S. Enteritidis*; Lane 4, *S. Paratyphi A*; Lane 5, *S. Typhi*; Lane 6, *S. Albany*; Lane 7, *Corvallis*; Lane 8, *S. Pullarom*; and Lane 9, negative control. **(C)** The selectivity test for non-*Salmonella* bacteria: Lane 1, *V. cholerae*; Lane 2, *Sh. dysenteriae*; Lane 3, *E. coli*; Lane 4, *K. pneumoniae*; and Lane 5, *Staph. aureus* with 100 bp ladder.
